# Supplementary material for: An unexplored angle: T cell antigen discoveries reveal a marginal contribution of proteasome splicing to the immunogenic MHC class I antigen pool
Source: PubMed Central journal article supplement — Proc Natl Acad Sci U S A. 2022 Jul 8;119(29):e2119736119. doi: 10.1073/pnas.2119736119 (PMC9303865; doi:10.1073/pnas.2119736119), 2022-07-08
Supplement: pnas.2119736119.sapp.pdf [file pnas.2119736119.sapp.pdf]

## Supporting information for:

An unexplored angle: T cell antigen discoveries reveal a marginal contribution of proteasome splicing to the immunogenic MHC class I antigen pool

*Tamara Verkerk<sup>1,2,3#</sup>\*, Sofie J.I. Koomen<sup>1,3#</sup>, Kyra J. Fuchs<sup>4</sup>, Marieke Griffioen<sup>4</sup>, Robbert M. Spaapen<sup>1,3\*</sup>*

<sup>1</sup>*Department of Immunopathology, Sanquin Research, Amsterdam, 1066 CX, The Netherlands*

<sup>2</sup>*Department of Hematopoiesis, Sanquin Research, Amsterdam, 1066 CX, The Netherlands*

<sup>3</sup>*Landsteiner Laboratory, Amsterdam UMC, University of Amsterdam, Amsterdam, 1066 CX, The Netherlands*

<sup>4</sup>*Department of Hematology, LUMC, Leiden, 2333 ZA, The Netherlands*

*#These authors contributed equally to this work.*

**Running Title:** Splicing marginally contributes to the peptidome

**Keywords:** PCPS, spliced antigens, spliced peptides, immunopeptidome, tumor antigens, minor H antigens, HLA class I

**\*Correspondence:** t.verkerk@sanquin.nl, robbert.spaapen@neogene.com

## This PDF file includes:

Figure S1

Tables S1 to S3

SI Methods

SI References

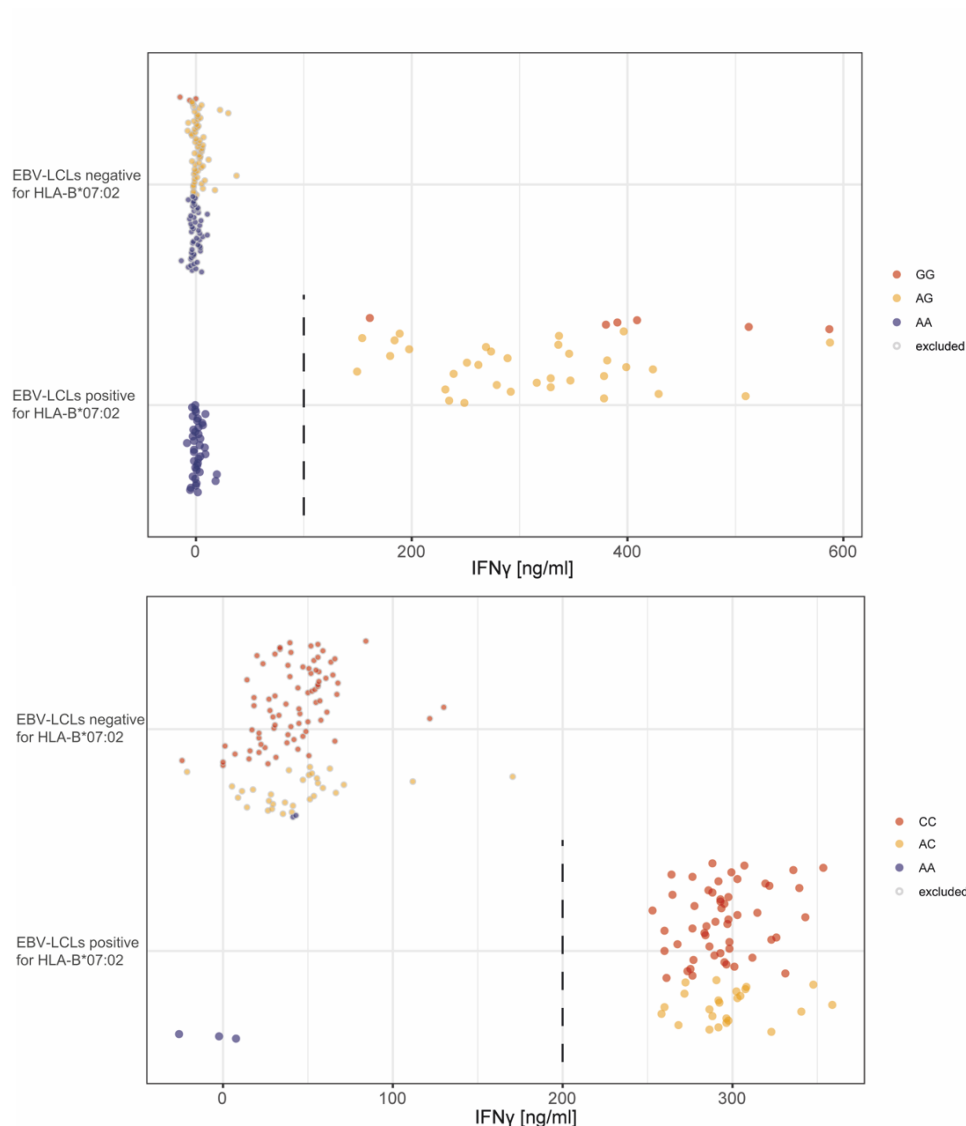

**Figure S1. Identification of hematopoietic minor histocompatibility antigens by GWAS.** For identification of minor H antigens, T cell clones were evaluated for their reactivity against a panel of 191 EBV-LCLs (IFN- $\gamma$  release, X-axis). SNPs in these EBV-LCLs were sequenced and genotyped by the 1000 Genomes Project. Two example HLA-B\*07:02-restricted T cell clones for which the cognate minor H antigens were identified in the ensuing GWAS with the lowest (top panel) and highest (bottom panel) observed p-values are displayed. EBV-LCLs negative for HLA-B\*07:02 were excluded from the GWAS (top within each panel). Results are shown for associating SNPs encoding the minor H antigens. EBV-LCLs that encode the minor H antigen encoding SNP allele are shown by red (GG in top and CC in bottom panel) and yellow (AG in top and AC in bottom panel) dots, whereas blue dots represent EBV-LCLs that harbored the negative allele (AA).

**Table S1. List of all reported HLA class I restricted minor H antigens identified using forward antigen identification strategies.**

| spliced minor H antigens     |                |                         |              |           |
|------------------------------|----------------|-------------------------|--------------|-----------|
| peptide                      | antigen name   | HLA class I restriction | method       | reference |
| [SLPRGT][STPK]               | SP110          | HLA-A*03:01             | cDNA library | (1)       |
| non-spliced minor H antigens |                |                         |              |           |
| peptide                      | antigen name   | HLA class I restriction | method       | reference |
| RTLSPEIITV                   | LB-WNK1-1I     | HLA-A*02:01             | GWAS         | (2)       |
| SLAVAQDLT                    | LB-SSR1-1S     |                         |              |           |
| FMWDVAEDLKA                  | LB-PRCP-1D     |                         |              |           |
| HPRQEQIALLA                  | LB-ERAP1-1R    | HLA-B*07:02             |              |           |
| QPRRALLFVIL                  | LB-BCAT2-1R    |                         |              |           |
| LPRACWREA                    | LB-ARHGDIB-1R  |                         |              |           |
| GPDSKTFLLCL                  | LB-PDCD11-1F   |                         |              |           |
| FPALRFVEV                    | LB-GEMIN4-1V   |                         |              |           |
| RPRARYYIQV                   | LB-EBI3-1I     |                         |              |           |
| KPQYHAEMCF                   | LB-APOBEC3B-1K |                         |              |           |
| WLQGVVPVV                    | LB-NCAPD3-1Q   | HLA-A*02:01             |              |           |
| HLEEQIPKV                    | LB-NDC80-1P    |                         |              |           |
| CADPSETWV                    | LB-CCL4-1T     |                         |              |           |
| RPCPSVGLSFL                  | LB-C16ORF-1R   | HLA-B*07:02             |              |           |
| RPRSVTIQPLL                  | LB-TMEM8A-1I   |                         |              |           |
| RPRYWILLVKI                  | LB-ZDHC6-1Y    |                         |              |           |
| CPRPGTWTC                    | LB-MOB3A-1C    | HLA-B*08:01             |              |           |
| FPALRFVEV                    | LB-GEMIN4-2V   |                         |              |           |
| DLRCKYVSL                    | LB-GSTP1-1V    |                         |              |           |
| KPQYHAEMCF                   | LB-APOBEC3B-2K | HLA-B*13:01             |              |           |
| TQAQIFDYSEI                  | LB-PNP-1S      |                         |              |           |
| NEIEDVWQLDL                  | LB-ZNFX1-1Q    |                         |              |           |
| TAWPGAPEV                    | LB-C19ORF48-2E | HLA-B*51:01             |              |           |

|               |                |                   |                 |      |
|---------------|----------------|-------------------|-----------------|------|
| RLRQVGSWL     | LB-FUCA2-1V    | HLA-B*07:02       | GWAS            | (4)  |
| DYLCQVLQI     | ACC-1C         | HLA-A*24:02       | GWAS            | (5)  |
| QLLNSVLTL     | UTA2-1         | HLA-A*02:01       | GWAS            | (6)  |
| RLHDGRVVFV    | LB-TTK-1D      | HLA-A*02:01       | GWAS            | (7)  |
| CVATMIFMI     | UGT2B17/A2     | HLA-A*02:06       | GWAS            | (8)  |
| AETANGGLAL    | SLC1A5         | HLA-B*40:02       |                 |      |
| IPRDSWWVEL    | ZAPHIR         | HLA-B*07:02       | GWAS            | (9)  |
| SVLPEVDVW     | DHP1           | HLA-B*57:01       | GWAS            | (10) |
| WFHHCHPKY     | P2RX7          | HLA-A*29:02       |                 |      |
| STMERWGQKY    | LB-CYBA-1Y     | HLA-A*01:01       | GWAS            | (11) |
| GISCQGIIAV    | LB-DHX33-1C    | HLA-A*02:01       |                 |      |
| KQSPASQLQK    | LB-IMMT-1S     | HLA-A*03:01       |                 |      |
| KYMTAVVKLF    | LB-CYBA-2Y     | HLA-A*23:01/24:02 |                 |      |
| RPRGARTIQQ    | LB-YIPF1-1T    | HLA-B*07:02       |                 |      |
| HLWSRPRCL     | LB-STK32C-1R   | HLA-B*08:01       |                 |      |
| YYRTNHTVM     | LB-MAN2B1-1T   | HLA-C*07:02       |                 |      |
| GQVRLRALY     | LB-GLE1-1V     | HLA-B*15:01       | GWAS            | (12) |
| GQAGFFPSPF    | LB-ITGB2-1     | HLA-B*15:01       |                 |      |
| AVHNGLGEKGSQA | LB-NADK-1K     | HLA-A*03:01       | GWAS            | (13) |
| SEDLILCRL     | LB-NUP133-1R   | HLA-B*40:01       | GWAS            | (14) |
| SETKQRTVL     | LB-SON-1R      |                   |                 |      |
| MEQLEQLEL     | LB-SWAP70-1Q   |                   |                 |      |
| GEPQDLCTL     | LB-TRIP10-1EPC |                   | cDNA library    |      |
| DYLCQYVLQI    | ACC-1Y         | HLA-A*24:02       | genetic linkage | (15) |
| TPNQRQNVV     | LRH-1          | HLA-B*07:02       | genetic linkage | (16) |
| ISKERAEAL     | HEATR1         | HLA-B*08:01       | genetic linkage | (17) |
| YIGEVLVSV     | HA-2           | HLA-A*02:01       | peptide elution | (18) |
| VLHDDLLEA     | HA-1           | HLA-A*02:01       | peptide elution | (19) |
| RTLDKVLEV     | HA-8           | HLA-A*02:01       | peptide elution | (20) |
| SVAPALALFPA   | LB-ADIR-1F     | HLA-A*02:01       | peptide elution | (21) |

|             |             |                |                                       |          |
|-------------|-------------|----------------|---------------------------------------|----------|
| VTEPGTAQY   | HA-3        | HLA-A*01:01    | peptide elution                       | (22)     |
| RVWDLPGVLK  | PANE1       | HLA-A*03:01    | peptide elution                       | (23)     |
| KEFEDDIINW  | ACC-2D      | HLA-B*44:02/03 |                                       |          |
| SPSVDKARAEL | SMCY        | HLA-B*07:02    | peptide elution                       | (24)     |
| IVDCLTEMY   | DFFRY       | HLA-A*01:01    | peptide elution<br>small cDNA library | (25, 26) |
| EEKRGS�HVW  | HB-1H       | HLA-B*44:03    | cDNA library                          | (27)     |
| AELLNIPFLY  | UGT2B17/A29 | HLA-A*29:02    | cDNA library                          | (28, 29) |
| AELLNIPFLY  | UGT2B17/B44 | HLA-B*44:02/03 |                                       |          |
| RPHAIRRPLAL | LB-ECGF-1H  | HLA-B*07:02    | cDNA library                          | (30)     |
| ATLPLLCAR   | ACC-4       | HLA-A*31:01    | cDNA library                          | (31)     |
| WATLPLLCAR  | ACC-5       | HLA-A*33:01    |                                       |          |
| MEIFIEVFSHF | ACC-6       | HLA-B*44:03    | cDNA library                          | (32)     |
| CIPPDSLLFPA | C19ORF48    | HLA-A*02:01    | cDNA library                          | (33)     |
| MAVPPCCIGV  | TRIM22      | HLA-A*02:01    | cDNA library                          | (34)     |
| SRDSRGKPGY  | DBY         | HLA-B*27:05    | small cDNA library                    | (35)     |
| TIRYPDPVI   | RPS4Y       | HLA-B*52:01    | small cDNA library                    | (36)     |
| MQQMRHKEV   | UTY         | HLA-B*52:01    | small cDNA library                    | (37)     |
| EVLLRPGLHFR | UTY         | HLA-A*33:03    | small cDNA library                    | (38)     |
| RESEESVSL   | UTY         | HLA-B*40:01    | small cDNA library                    | (39)     |
| LPHNHTDL    | UTY         | HLA-B*08:01    | small cDNA library                    | (40)     |

**Table S2. T cell clones with identified minor H antigens (n=75)**

| HLA allele | associating SNPs | no. of antigens | observed p-value  | EC50 (M)          |
|------------|------------------|-----------------|-------------------|-------------------|
| A*01:01    | missense SNPs    | 4               | 3.3E-11 - 3.7E-07 | 7.0E-09 - 4.1E-06 |
|            | other SNPs       | 1               | 2.9E-14           | 5.9E-08           |
| A*02:01    | missense SNPs    | 7               | 3.4E-21 - 2.9E-04 | 1.7E-10 - 7.0E-06 |
|            | other SNPs       | 2               | 2.1E-23 - 7.5E-21 | 1.2E-11 - 4.8E-10 |
| A*03:01    | missense SNPs    | 9               | 3.2E-17 - 5.0E-09 | 9.0E-11 - 1.0E-06 |
|            | other SNPs       | 0               |                   |                   |
| B*07:02    | missense SNPs    | 16              | 1.8E-19 - 3.0E-05 | 2.2E-11 - 1.4E-06 |
|            | other SNPs       | 14              | 1.6E-18 - 1.7E-07 | 2.2E-10 - 1.5E-06 |
| B*08:01    | missense SNPs    | 6               | 1.5E-12 - 2.7E-07 | 6.7E-18 - 6.7E-07 |
|            | other SNPs       | 4               | 2.1E-15 - 9.1E-06 | 4.6E-08 - 1.8E-06 |
| C*07:01    | missense SNPs    | 2               | 1.4E-14 - 1.2E-08 | 8.4E-09 - 1.1E-08 |
|            | other SNPs       | 0               |                   |                   |
| C*07:02    | missense SNPs    | 2               | 3.0E-11 - 5.3E-10 | 3.1E-08 - 2.4E-04 |
|            | other SNPs       | 0               |                   |                   |
| Other      | missense SNPs    | 7               | 2.3E-09 - 5.1E-04 | 1.1E-10 - 3.2E-06 |
|            | other SNPs       | 1               | 2.4E-08           | 2.63E-06          |

**Table S3. T cell clones with yet unidentified minor H antigens (n=8)**

| HLA allele         | associating SNPs | no. of antigens | observed p-value    |
|--------------------|------------------|-----------------|---------------------|
| A*02:01            | missense SNP     | 1               | 5.04E-15            |
| A*03:01            | missense SNP     | 1               | 2.53E-11            |
| B*07:02            | missense SNPs    | 3               | 1.36E-16 - 2.32E-11 |
|                    | other SNP        | 1               | 4.88E-11            |
| B*08:01            | other SNP        | 1               | 7.23E-07            |
| B*44:02<br>B*44:03 | missense SNP     | 1               | 5.46E-08            |

## SI Methods

### *Summary of the methodology*

The methodology used for the minor H antigen identifications is exactly according our recently published manuscript (11) which is schematically depicted in Figure 2D. In short, 83 T cell clones exclusively recognizing patient-derived, but not donor EBV-transformed B cells (EBV-LCLs) were tested for reactivity against a panel of 191 EBV-LCLs of the 1000 Genomes Project. The IFN- $\gamma$  secretion profile of each T cell clone against the individual EBV-LCLs in the panel was first analyzed to determine the HLA restriction of the minor H antigens (examples in *SI Appendix*, Figure S1, overview in *SI Appendix*, Tables S2 and S3). The data of restricted HLA allele positive individuals was subsequently used to run a Whole Genome Association Scanning (GWAS) analysis to identify SNPs correlating with the recognition pattern of these EBV-LCLs (*SI Appendix*, Figure S1).

The majority of associations were highly significant on a genome-wide scale ( $p < 5 * 10^{-8}$ ) (*SI Appendix*, Tables S2 and S3). A large proportion of these most significant SNPs were missense SNPs (for 61 of the 83 T cell clones), suggesting that its encoded polymorphic peptide sequence may be the sought minor H antigen recognized by the respective T cell clone (*SI Appendix*, Tables S2 and S3). For each of the SNPs, various synthetic peptides covering the SNP were loaded on minor H antigen negative but restricted HLA allele positive EBV-LCLs (11). These cells were then evaluated for their capacity to activate the respective T cell clones. 75 of these epitopes were recognized by the respective T cell clones, after which the EC50 was determined (*SI Appendix*, Table S2). As described in the manuscript, 8 of the 83 minor H antigens were not elucidated using this methodology of which 6 were associated with nonsense SNPs (*SI Appendix*, Table S3).

### *Patients*

Samples were collected from patients after approval by the LUMC Institutional Review Board and obtaining written informed consent according to the Declaration of Helsinki. Samples were de-identified prior to use in our study. The patients underwent allogeneic stem cell transplantation as treatment for their hematological malignancy. T cell clones were derived from peripheral blood cells and cultured in IMDM supplemented with fetal bovine serum (5%), human serum (5%, Sanquin) and IL-2 (120 IU/ml, Novartis) using a standard PHA (Remel) and feeder stimulation protocol as described in detail before (11).

### *EBV-LCL culture and T cell reactivity assays*

EBV-LCLs (Coriell Cell Repositories) were cultured in IMDM with 10% fetal bovine serum. Cells were seeded in duplicate in 96-well plates and cryopreserved. T cell clones were tested for recognition of EBV-LCLs by overnight incubation T cells with freshly thawed EBV-LCLs loaded with or without peptide in the presence of IL-2 (20 IU/ml) in 384-well plates. Culture supernatant was analyzed for the presence of IFN- $\gamma$  by ELISA according to manufacturer's instructions (Sanquin). 83 T cell clones exclusively recognizing patient-derived, but not donor-derived EBV-LCLs were selected for epitope identification based on whole genome association scanning (GWAS).

### *Whole Genome Association Scanning*

For each T cell clone, HLA restriction was determined by analyzing the shared expression of a single HLA class I molecule by EBV-LCLs that were positively recognized in the reactivity assay. For the GWAS, all EBV-LCLs expressing the restricted HLA class I allele were included, while the other EBV-LCLs were excluded. The alleles of all genotyped SNPs in the EBV-LCLs were associated with T cell recognition patterns of the same EBV-LCLs by a Fisher's exact test using Plink. SNPs with a p-value cut-off at  $10^{-5}$

were selected for epitope validation experiments. Gene regions surrounding the associating SNP were in silico translated in 6 frames and analyzed for peptides with predicted binding to the restricted HLA allele by NetMHCpan 4.1. Data was visualized using R.

#### *Validation of New Minor Histocompatibility Antigens*

Candidate peptides for minor histocompatibility antigens as well as their allelic variants were synthesized in house (purity >75%) and dissolved in DMSO. For validation and to calculate EC50 values, stem cell donor-derived EBV-LCLs were pulsed with the peptides titrated in concentrations ranging from 50  $\mu$ M to 1 pM and tested for recognition by the respective T cell clone by IFN- $\gamma$  ELISA.



## SI References

1. E. H. Warren, N. J. Vigneron, M. A. Gavin, P. G. Coulie, V. Stroobant, A. Dalet, S. S. Tykodi, S. M. Xuereb, J. K. Mito, S. R. Riddell, B. J. Van Den Eynde, An antigen produced by splicing of noncontiguous peptides in the reverse order. *Science (80-. )*. **313**, 1444–1447 (2006).
2. C. A. M. Van Bergen, C. E. Rutten, E. D. Van Der Meijden, S. A. P. Van Luxemburg-Heijs, E. G. A. Lurvink, J. J. Houwing-Duistermaat, M. G. D. Kester, A. Mulder, R. Willemze, J. H. F. Falkenburg, M. Griffioen, High-throughput characterization of 10 new minor histocompatibility antigens by whole genome association scanning. *Cancer Res.* **70**, 9073–9083 (2010).
3. C. A. M. Van Bergen, S. A. P. Van Luxemburg-Heijs, L. C. De Wreede, M. Eefting, P. A. Von Dem Borne, P. Van Balen, M. H. M. Heemskerk, A. Mulder, F. H. J. Claas, M. A. Navarrete, W. M. Honders, C. E. Rutten, H. Veelken, I. Jedema, C. J. M. Halkes, M. Griffioen, J. H. F. Falkenburg, Selective graft-versus-leukemia depends on magnitude and diversity of the alloreactive T cell response. *J. Clin. Invest.* **127**, 517–529 (2017).
4. C. A. M. van Bergen, E. M. E. Verdegaal, M. W. Honders, C. Hoogstraten, A. Q. M. J. Steijn-van Tol, L. de Quartel, J. de Jong, M. Meyering, J. H. F. Falkenburg, M. Griffioen, S. Osanto, Durable Remission of Renal Cell Carcinoma in Conjunction with Graft versus Host Disease following Allogeneic Stem Cell Transplantation and Donor Lymphocyte Infusion: Rule or Exception? *PLoS One.* **9**, 1–8 (2014).
5. T. Kawase, Y. Nannya, H. Torikai, G. Yamamoto, M. Onizuka, S. Morishima, K. Tsujimura, K. Miyamura, Y. Kodera, Y. Morishima, T. Takahashi, K. Kuzushima, S. Ogawa, Y. Akatsuka, Identification of human minor histocompatibility antigens based on genetic association with highly parallel genotyping of pooled DNA. *Blood.* **111**, 3286–3294 (2008).
6. R. Oostvogels, H. M. Lokhorst, M. C. Minnema, M. van Elk, K. van den Oudenalder, E. Spierings, T. Mutis, R. M. Spaapen, Identification of minor histocompatibility antigens based on the 1000 Genomes Project. *Haematologica.* **99**, 1854–1859 (2014).
7. M. J. Pont, R. Oostvogels, C. A. M. van Bergen, E. D. van der Meijden, M. W. Honders, S. Bliss, M. L. M. Jongsma, H. M. Lokhorst, J. H. Frederik Falkenburg, T. Mutis, M. Griffioen, R. M. Spaapen, T cells specific for an unconventional natural antigen fail to recognize leukemic cells. *Cancer Immunol. Res.* **7**, 797–804 (2019).
8. M. Kamei, Y. Nannya, H. Torikai, T. Kawase, K. Taura, Y. Inamoto, T. Takahashi, M. Yazaki, S. Morishima, K. Tsujimura, K. Miyamura, T. Ito, H. Togari, S. R. Riddell, Y. Kodera, Y. Morishima, T. Takahashi, K. Kuzushima, S. Ogawa, Y. Akatsuka, HapMap scanning of novel human minor histocompatibility antigens. *Blood.* **113**, 5041–5048 (2009).
9. K. Broen, H. Levenga, J. Vos, K. van Bergen, H. Fredrix, A. Greupink-Draaisma, M. Kester, J. H. F. Falkenburg, P. de Mulder, T. de Witte, M. Griffioen, H. Dolstra, A polymorphism in the splice donor site of ZNF419 results in the novel renal cell carcinoma-associated minor histocompatibility antigen ZAPHIR. *PLoS One.* **6**, e21699 (2011).
10. E. H. Warren, N. Fujii, Y. Akatsuka, C. N. Chaney, J. K. Mito, K. R. Loeb, T. A. Gooley, M. L. Brown, K. K. W. Koo, K. V Rosinski, S. Ogawa, A. Matsubara, F. R. Appelbaum, S. R. Riddell, Therapy of relapsed leukemia after allogeneic hematopoietic cell transplantation with T cells specific for minor histocompatibility antigens. *Blood.* **115**, 3869–3878 (2010).
11. K. J. Fuchs, M. W. Honders, E. D. van der Meijden, A. E. Adriaans, D. I. van der Lee, M. J. Pont, R. Monajemi, S. M. Kielbasa, P. A. C. 't Hoen, C. A. M. van Bergen, J. H. F. Falkenburg, M. Griffioen, Optimized Whole Genome Association Scanning for Discovery of HLA Class I-

- Restricted Minor Histocompatibility Antigens. *Front. Immunol.* **11**, 659 (2020).
12. M. J. Pont, D. I. van der Lee, E. D. van der Meijden, C. A. M. van Bergen, M. G. D. Kester, M. W. Honders, M. Vermaat, M. Eefting, E. W. A. Marijt, S. M. Kielbasa, P. A. C. 't Hoen, J. H. F. Falkenburg, M. Griffioen, Integrated Whole Genome and Transcriptome Analysis Identified a Therapeutic Minor Histocompatibility Antigen in a Splice Variant of ITGB2. *Clin. cancer Res. an Off. J. Am. Assoc. Cancer Res.* **22**, 4185–4196 (2016).
  13. P. van Balen, C. A. M. van Bergen, S. A. P. van Luxemburg-Heijs, W. de Klerk, E. H. M. van Egmond, S. A. J. Veld, C. J. M. Halkes, J.-J. Zwaginga, M. Griffioen, I. Jedema, J. H. F. Falkenburg, CD4 Donor Lymphocyte Infusion Can Cause Conversion of Chimerism Without GVHD by Inducing Immune Responses Targeting Minor Histocompatibility Antigens in HLA Class II. *Front. Immunol.* **9**, 3016 (2018).
  14. M. Griffioen, M. W. Honders, E. D. van der Meijden, S. A. P. van Luxemburg-Heijs, E. G. A. Lurvink, M. G. D. Kester, C. A. M. van Bergen, J. H. F. Falkenburg, Identification of 4 novel HLA-B\*40:01 restricted minor histocompatibility antigens and their potential as targets for graft-versus-leukemia reactivity. *Haematologica.* **97**, 1196–1204 (2012).
  15. Y. Akatsuka, T. Nishida, E. Kondo, M. Miyazaki, H. Taji, H. Iida, K. Tsujimura, M. Yazaki, T. Naoe, Y. Morishima, Y. Kodera, K. Kuzushima, T. Takahashi, Identification of a polymorphic gene, BCL2A1, encoding two novel hematopoietic lineage-specific minor histocompatibility antigens. *J. Exp. Med.* **197**, 1489–1500 (2003).
  16. B. de Rijke, A. van Horssen-Zoetbrood, J. M. Beekman, B. Otterud, F. Maas, R. Woestenenk, M. Kester, M. Leppert, A. V Schattenberg, T. de Witte, E. van de Wiel-van Kemenade, H. Dolstra, A frameshift polymorphism in P2X5 elicits an allogeneic cytotoxic T lymphocyte response associated with remission of chronic myeloid leukemia. *J. Clin. Invest.* **115**, 3506–3516 (2005).
  17. M. Bleakley, B. E. Otterud, J. L. Richardt, A. D. Mollerup, M. Hudecek, T. Nishida, C. N. Chaney, E. H. Warren, M. F. Leppert, S. R. Riddell, Leukemia-associated minor histocompatibility antigen discovery using T-cell clones isolated by in vitro stimulation of naive CD8+ T cells. *Blood.* **115**, 4923–4933 (2010).
  18. J. M. den Haan, N. E. Sherman, E. Blokland, E. Huczko, F. Koning, J. W. Drijfhout, J. Skipper, J. Shabanowitz, D. F. Hunt, V. H. Engelhard, Identification of a graft versus host disease-associated human minor histocompatibility antigen. *Science.* **268**, 1476–1480 (1995).
  19. J. M. den Haan, L. M. Meadows, W. Wang, J. Pool, E. Blokland, T. L. Bishop, C. Reinhardus, J. Shabanowitz, R. Offringa, D. F. Hunt, V. H. Engelhard, E. Goulmy, The minor histocompatibility antigen HA-1: a diallelic gene with a single amino acid polymorphism. *Science.* **279**, 1054–1057 (1998).
  20. E. H. Warren, B. E. Otterud, R. W. Linterman, A. G. Brickner, V. H. Engelhard, M. F. Leppert, P. J. Martin, S. R. Riddell, Feasibility of using genetic linkage analysis to identify the genes encoding T cell-defined minor histocompatibility antigens. *Tissue Antigens.* **59**, 293–303 (2002).
  21. C. A. M. van Bergen, M. G. D. Kester, I. Jedema, M. H. M. Heemskerk, S. A. P. van Luxemburg-Heijs, F. M. Kloosterboer, W. A. E. Marijt, A. H. de Ru, M. R. Schaafsma, R. Willemze, P. A. van Veelen, J. H. F. Falkenburg, Multiple myeloma-reactive T cells recognize an activation-induced minor histocompatibility antigen encoded by the ATP-dependent interferon-responsive (ADIR) gene. *Blood.* **109**, 4089–4096 (2007).
  22. E. Spierings, A. G. Brickner, J. A. Caldwell, S. Zegveld, N. Tatsis, E. Blokland, J. Pool, R. A.

- Pierce, S. Mollah, J. Shabanowitz, L. C. Eisenlohr, P. Van Veelen, F. Ossendorp, D. F. Hunt, E. Goulmy, V. H. Engelhard, The minor histocompatibility antigen HA-3 arises from differential proteasome-mediated cleavage of the lymphoid blast crisis (Lbc) oncoprotein. *Blood*. **102**, 621–629 (2003).
23. A. G. Brickner, A. M. Evans, J. K. Mito, S. M. Xuereb, X. Feng, T. Nishida, L. Fairfull, R. E. Ferrell, K. A. Foon, D. F. Hunt, J. Shabanowitz, V. H. Engelhard, S. R. Riddell, E. H. Warren, The PANE1 gene encodes a novel human minor histocompatibility antigen that is selectively expressed in B-lymphoid cells and B-CLL. *Blood*. **107**, 3779–3786 (2006).
  24. W. Wang, L. R. Meadows, J. M. den Haan, N. E. Sherman, Y. Chen, E. Blokland, J. Shabanowitz, A. I. Agulnik, R. C. Hendrickson, C. E. Bishop, Human H-Y: a male-specific histocompatibility antigen derived from the SMCY protein. *Science*. **269**, 1588–1590 (1995).
  25. R. A. Pierce, E. D. Field, J. M. den Haan, J. A. Caldwell, F. M. White, J. A. Marto, W. Wang, L. M. Frost, E. Blokland, C. Reinhardus, J. Shabanowitz, D. F. Hunt, E. Goulmy, V. H. Engelhard, Cutting edge: the HLA-A\*0101-restricted HY minor histocompatibility antigen originates from DFFRY and contains a cysteinylated cysteine residue as identified by a novel mass spectrometric technique. *J. Immunol.* **163**, 6360–6364 (1999).
  26. M. H. Vogt, R. A. de Paus, P. J. Voogt, R. Willemze, J. H. Falkenburg, DFFRY codes for a new human male-specific minor transplantation antigen involved in bone marrow graft rejection. *Blood*. **95**, 1100–1105 (2000).
  27. H. Dolstra, H. Fredrix, F. Maas, P. G. Coulie, F. Brasseur, E. Mensink, G. J. Adema, T. M. de Witte, C. G. Figdor, E. van de Wiel-van Kemenade, A human minor histocompatibility antigen specific for B cell acute lymphoblastic leukemia. *J. Exp. Med.* **189**, 301–308 (1999).
  28. M. Murata, E. H. Warren, S. R. Riddell, A human minor histocompatibility antigen resulting from differential expression due to a gene deletion. *J. Exp. Med.* **197**, 1279–1289 (2003).
  29. S. Terakura, M. Murata, E. H. Warren, A. Sette, J. Sidney, T. Naoe, S. R. Riddell, A single minor histocompatibility antigen encoded by UGT2B17 and presented by human leukocyte antigen-A\*2902 and -B\*4403. *Transplantation*. **83**, 1242–1248 (2007).
  30. E. H. Slager, M. W. Honders, E. D. van der Meijden, S. A. P. van Luxemburg-Heijs, F. M. Kloosterboer, M. G. D. Kester, I. Jedema, W. A. E. Marijt, M. R. Schaafsma, R. Willemze, J. H. F. Falkenburg, Identification of the angiogenic endothelial-cell growth factor-1/thymidine phosphorylase as a potential target for immunotherapy of cancer. *Blood*. **107**, 4954–4960 (2006).
  31. H. Torikai, Y. Akatsuka, M. Miyazaki, A. Tsujimura, Y. Yatabe, T. Kawase, Y. Nakao, K. Tsujimura, K. Motoyoshi, Y. Morishima, Y. Koderu, K. Kuzushima, T. Takahashi, The human cathepsin H gene encodes two novel minor histocompatibility antigen epitopes restricted by HLA-A\*3101 and -A\*3303. *Br. J. Haematol.* **134**, 406–416 (2006).
  32. T. Kawase, Y. Akatsuka, H. Torikai, S. Morishima, A. Oka, A. Tsujimura, M. Miyazaki, K. Tsujimura, K. Miyamura, S. Ogawa, H. Inoko, Y. Morishima, Y. Koderu, K. Kuzushima, T. Takahashi, Alternative splicing due to an intronic SNP in HMSD generates a novel minor histocompatibility antigen. *Blood*. **110**, 1055–1063 (2007).
  33. S. S. Tykodi, N. Fujii, N. Vigneron, S. M. Lu, J. K. Mito, M. X. Miranda, J. Chou, L. N. Voong, J. A. Thompson, B. M. Sandmaier, P. Cresswell, B. Van den Eynde, S. R. Riddell, E. H. Warren, C19orf48 encodes a minor histocompatibility antigen recognized by CD8+ cytotoxic T cells from renal cell carcinoma patients. *Clin. cancer Res. an Off. J. Am. Assoc. Cancer Res.* **14**, 5260–5269 (2008).

34. C. Wölfel, V. Lennerz, E. Lindemann, G. Hess, H. G. Derigs, C. Huber, W. Herr, T. Wölfel, Dissection and molecular analysis of alloreactive CD8<sup>+</sup> T cell responses in allogeneic haematopoietic stem cell transplantation. *Cancer Immunol. Immunother.* **57**, 849–857 (2008).
35. K. V. Rosinski, N. Fujii, J. K. Mito, K. K. W. Koo, S. M. Xuereb, O. Sala-Torra, J. S. Gibbs, J. P. Radich, Y. Akatsuka, B. J. Van Den Eynde, S. R. Riddell, E. H. Warren, DDX3Y encodes a class I MHC-restricted H-Y antigen that is expressed in leukemic stem cells. *Blood.* **111**, 4817–4826 (2008).
36. R. Ivanov, T. Aarts, S. Hol, A. Doornenbal, A. Hagenbeek, E. Petersen, S. Ebeling, *Clin. Cancer Res.*, in press, doi:10.1158/1078-0432.CCR-04-1772.
37. R. Ivanov, S. Hol, T. Aarts, A. Hagenbeek, E. H. Slager, S. Ebeling, UTY-specific TCR-transfer generates potential graft-versus-leukaemia effector T cells. *Br. J. Haematol.* **129**, 392–402 (2005).
38. H. Torikai, Y. Akatsuka, M. Miyazaki, E. H. 3rd Warren, T. Oba, K. Tsujimura, K. Motoyoshi, Y. Morishima, Y. Kodera, K. Kuzushima, T. Takahashi, A novel HLA-A\*3303-restricted minor histocompatibility antigen encoded by an unconventional open reading frame of human TMSB4Y gene. *J. Immunol.* **173**, 7046–7054 (2004).
39. M. H. Vogt, E. Goulmy, F. M. Kloosterboer, E. Blokland, R. A. de Paus, R. Willemze, J. H. Falkenburg, UTY gene codes for an HLA-B60-restricted human male-specific minor histocompatibility antigen involved in stem cell graft rejection: characterization of the critical polymorphic amino acid residues for T-cell recognition. *Blood.* **96**, 3126–3132 (2000).
40. E. H. Warren, M. A. Gavin, E. Simpson, P. Chandler, D. C. Page, C. Disteche, K. A. Stankey, P. D. Greenberg, S. R. Riddell, The human UTY gene encodes a novel HLA-B8-restricted H-Y antigen. *J. Immunol.* **164**, 2807–2814 (2000).
